# Supplementary material for: Mapping support for Systems Clinical Leadership in North West Local Dental Networks
Source: Research Square preprint supplement (doi:10.21203/rs.3.rs-7012620/v1), 2025-07-04
Supplement: Supplementary file 1 [file 4e6334b66dd517d7b80dcb17.docx]

| Supporting Systems Clinical Leadership within Local Dental Networks | | | |
| --- | --- | --- | --- |
| **Part 1 LDN Self-audit tool:** Complete this audit to assess the supporting structures and governance systems within your **Local Dental Network** | | | |
| **Local Dental Network:** | | |  |
| **Audit Date:** | | |  |
| **Does your LDN currently:** | **YES** | **NO** |  |
| Have a current Terms of Reference (TORs)? |  |  |  |
| Have a funded LDN chair? |  |  |  |
| Have a conflict of interest (COI) process? |  |  |  |
| Have an annual workplan? |  |  |  |
| Have a longer-term strategic plan? |  |  |  |
| Have funding for MCN chairs? |  |  |  |
| Have active MCNs in specialities: orthodontics, oral surgery, paediatrics, restorative, and special care dentistry? |  |  |  |
| Have a mechanism to report outcomes to commissioning organisation / wider system? |  |  |  |
| Meet at least quarterly? |  |  |  |
| Have access to formal training for members? |  |  |  |
| Have patient representatives as members? |  |  |  |

|  |  |  |  |
| --- | --- | --- | --- |
| **Part 2 MCN Self-audit tool:** Complete this audit to assess the supporting structures and governance systems within your **Managed Clinical Network** | | |  |
| **Managed Clinical Network:** | | |  |
| **Audit Date:** | | |  |
| **Does your MCN currently:** | **YES** | **NO** |  |
| Have Terms of Reference (TORs)? |  |  |  |
| Have a funded MCN chair? |  |  |  |
| Have an annual workplan? |  |  |  |
| Have an outcome reporting mechanism? |  |  |  |
| Meet at least quarterly? |  |  |  |
| Have formal training for members? |  |  |  |
